# Supplementary material
Source: PubMed Central journal article supplement (PMC4936273)
Supplement: NIHMS795924-supplement-Table_S2.pdf [file NIHMS795924-supplement-Table_S2.pdf]

| Outcome                         |                                                               | VTE Trials                                 | AF Trials                       |
|---------------------------------|---------------------------------------------------------------|--------------------------------------------|---------------------------------|
| <b>Primary Efficacy Outcome</b> | Recurrent VTE or related death during 6 months of trial       | AMPLIFY<br>RECOVER I/II                    |                                 |
|                                 | Recurrent VTE (DVT or nonfatal or fatal PE)                   | EINSTEIN-DVT<br>EINSTEIN-PE<br>Hokusai-VTE |                                 |
|                                 | Stroke (ischemic or hemorrhagic) or systemic embolism         |                                            | ARISTOTLE<br>RE-LY<br>ROCKET-AF |
|                                 | Time to first stroke or systemic embolic event                |                                            | ENGAGE                          |
| <b>Primary Safety Outcome</b>   | Major Bleeding                                                | AMPLIFY<br>RECOVER I/II                    | ARISTOTLE<br>ENGAGE<br>RE-LY    |
|                                 | Composite of major and clinically relevant non-major bleeding | EINSTEIN-DVT<br>EINSTEIN-PE<br>Hokusai-VTE | ROCKET-AF                       |
